# Supplementary material for: Screening of a Brassica napus bacterial artificial chromosome library using highly parallel single nucleotide polymorphism assays
Source: PubMed Central journal article supplement (PMC3846124; doi:10.1186/1471-2164-14-603), 2013-09-06

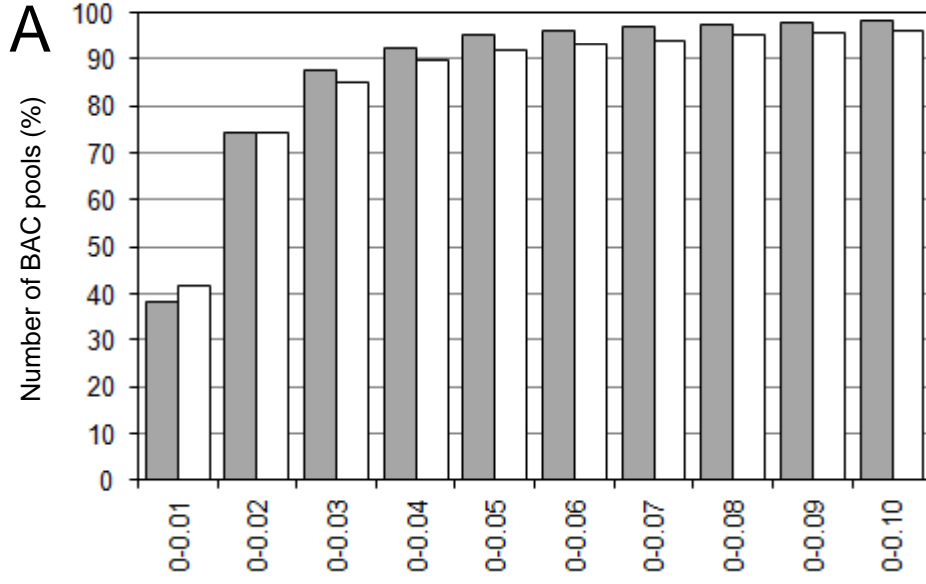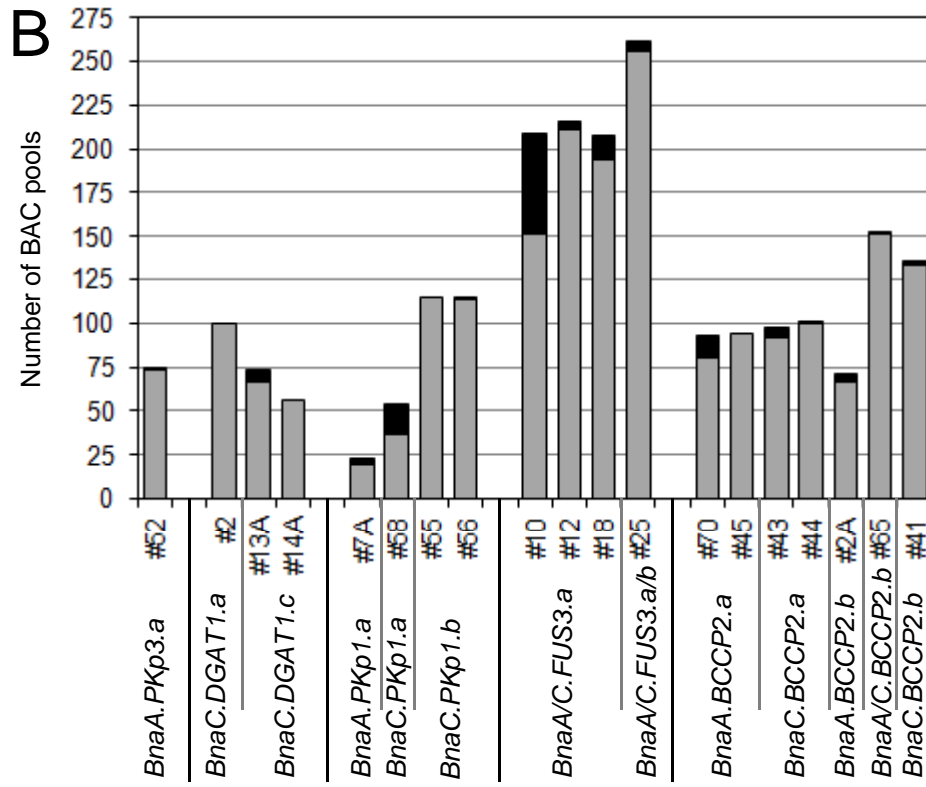

Supplement: 1471-2164-14-603-S3.pdf [file 1471-2164-14-603-S3.pdf]
